# Supplementary material
Source: Springer Nature journal article supplement (https://www.springermedizin.de/resource/supplementary/12943_2012_1134_MOESM10_ESM.pdf/9552572)

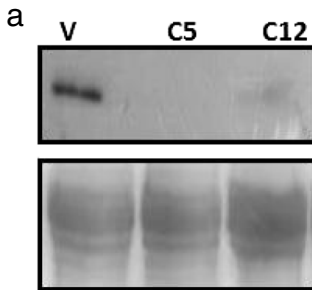

**b**

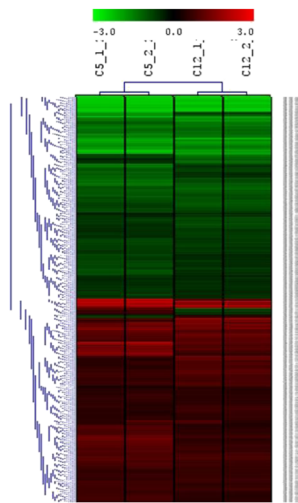

**c**

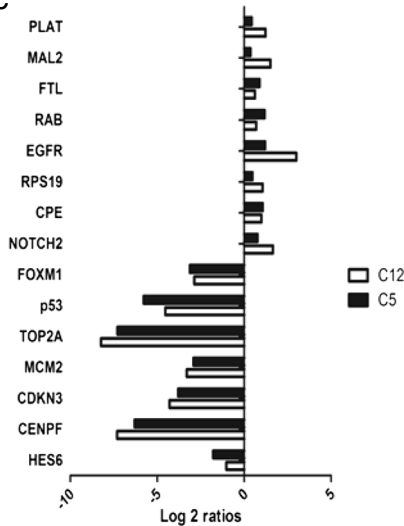

Supplement: MOESM10 [file 9552572]
